# Supplementary material for: Differential Metabolic Responses to Adipose Atrophy Associated with Cancer Cachexia and Caloric Restriction in Rats and the Effect of Rikkunshito in Cancer Cachexia
Source: MDPI journal article supplement (doi:10.3390/ijms19123852), 2018-12-03
Supplement: s1 [file s1]

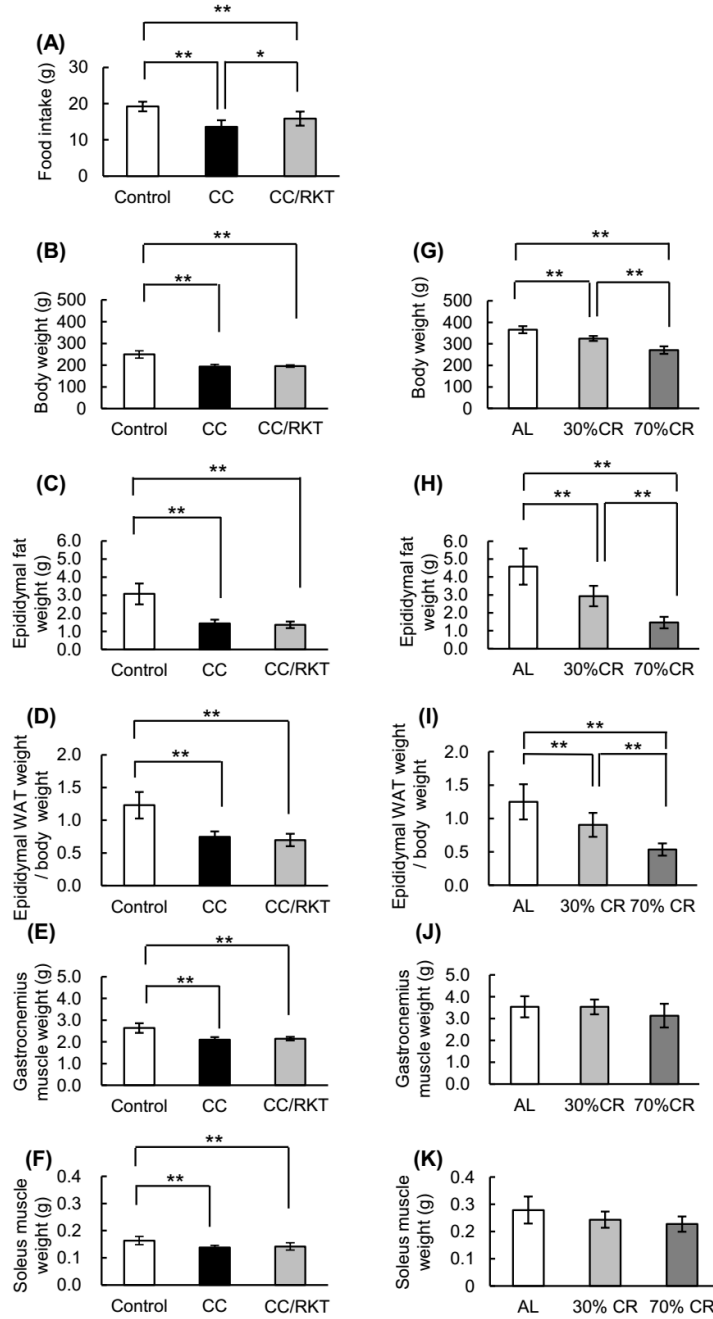

**Supplementary Figure S1.** Effects of cancer cachexia (CC), rikkunshito (RKT), and caloric restriction (CR) on the food intake, body weight, epididymal white adipose tissue (eWAT) weight and muscle weight. (A) Food intake of control and CC rats. (B,G) Body weight of CC and CC/RKT rats (B), and AL and CR rats (G). (C,H) Epididymal fat weight of CC and CC/RKT rats (C), and (H) AL and CR rats (H). (D,F) Epididymal fat weight per body weight of CC and CC/RKT rats (D), and AL and CR rats (I). (E,J) Gastrocnemius muscle weight of CC and CC/RKT rats (E), and AL and CR rats (J). (F,K) Soleus muscle weight of CC and CC/RKT rats (F), and AL and CR rats (K). Error bars represent the SD associated with each mean ( $n = 5-6$ ). \*  $p < 0.05$ , \*\*  $p < 0.01$  by Tukey's test.
